# Supplementary material for: CHD1 Remodels Chromatin and Influences Transient DNA Methylation at the Clock Gene frequency
Source: PubMed Central journal article supplement (PMC3140994; doi:10.1371/journal.pgen.1002166), 2011-07-21
Supplement: pgen.1002166.s002.pdf [file pgen.1002166.s002.pdf]

**A**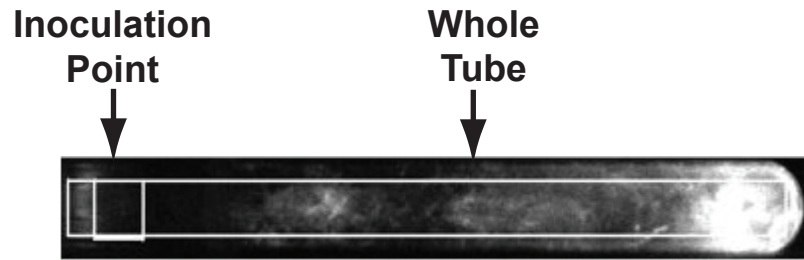**B**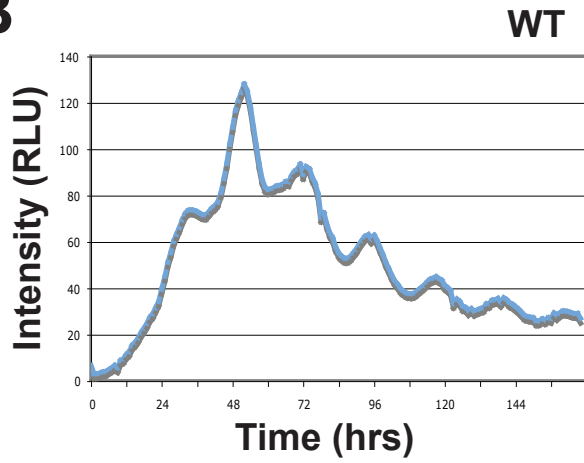**C**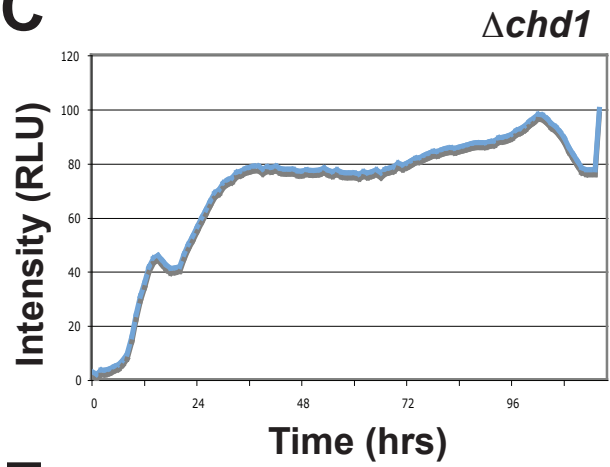

Whole Tube

**D**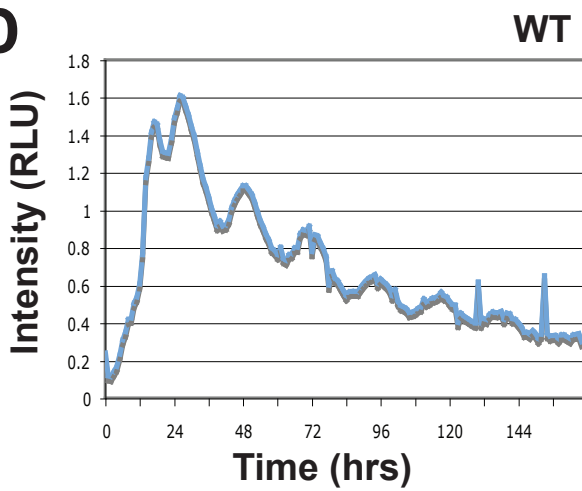**E**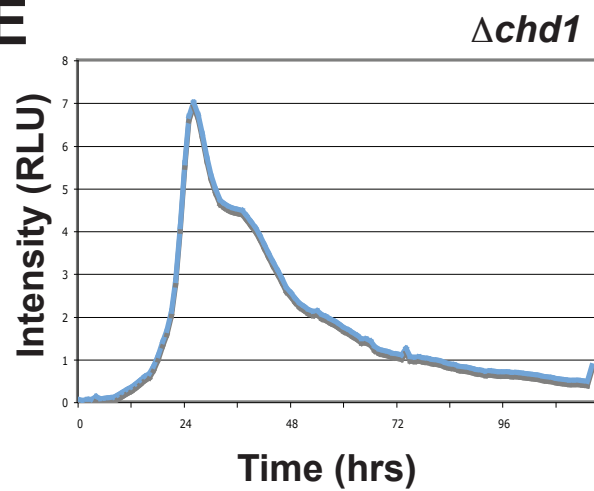

Inoculation Point

Sectional Analysis

**F**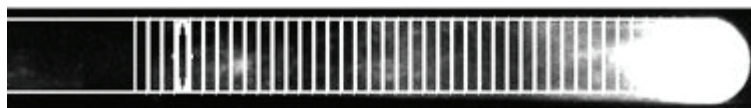**G**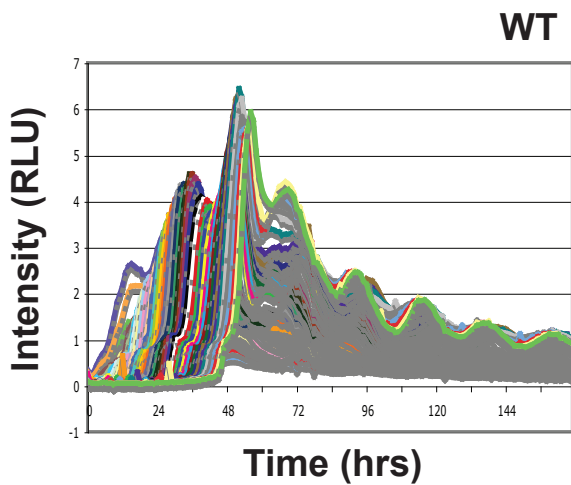**H**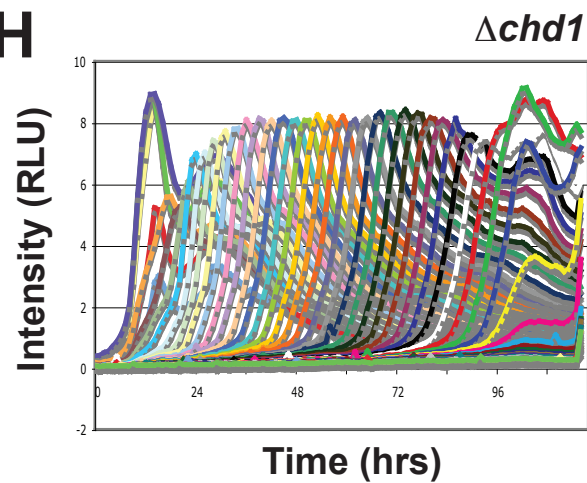

Sectional Analysis
