# Supplementary material for: CHD1 Remodels Chromatin and Influences Transient DNA Methylation at the Clock Gene frequency
Source: PubMed Central journal article supplement (PMC3140994; doi:10.1371/journal.pgen.1002166), 2011-07-21

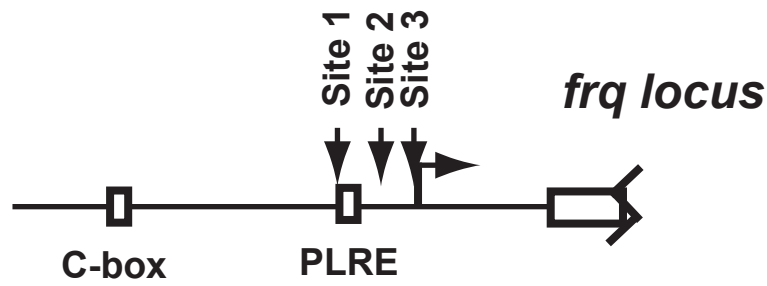**B**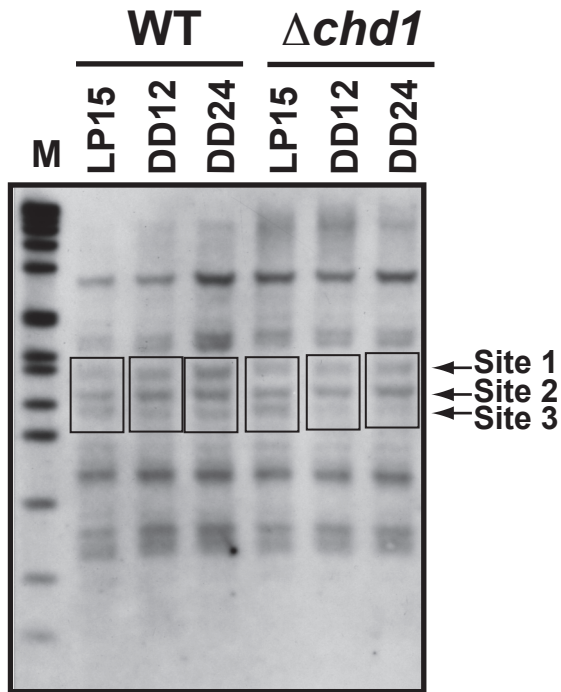**C**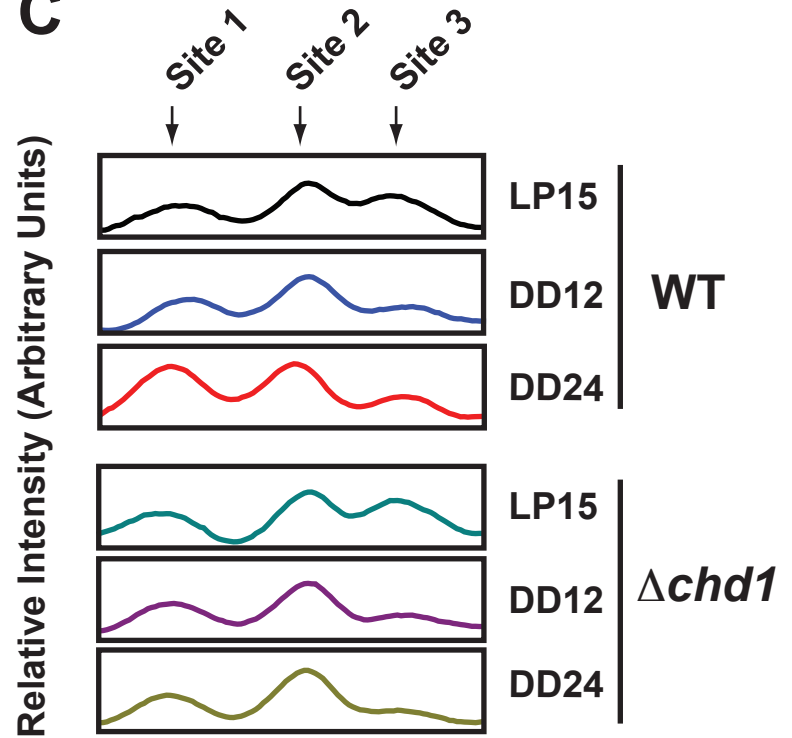**D**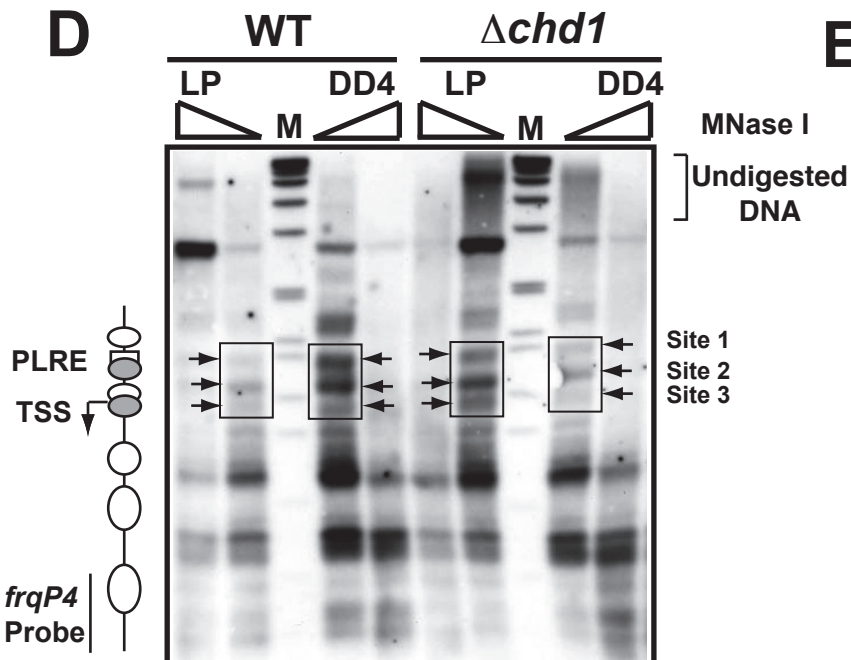**E**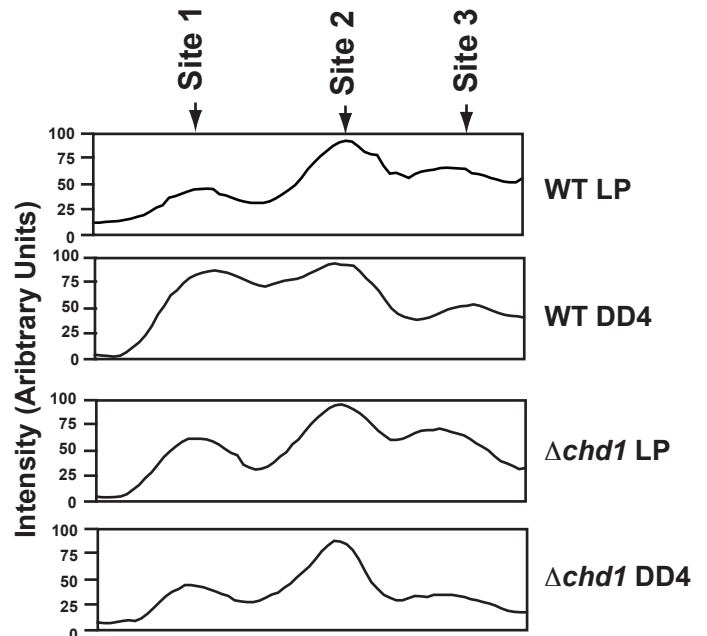

Supplement: pgen.1002166.s003.pdf [file pgen.1002166.s003.pdf]
