# Supplementary material for: CHD1 Remodels Chromatin and Influences Transient DNA Methylation at the Clock Gene frequency
Source: PubMed Central journal article supplement (PMC3140994; doi:10.1371/journal.pgen.1002166), 2011-07-21

**A**

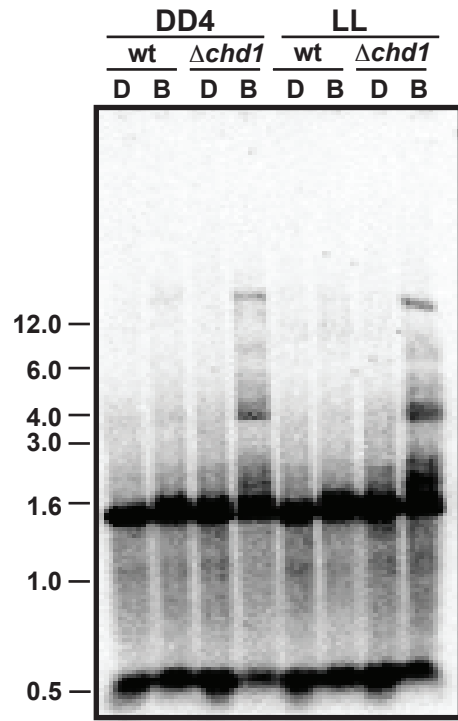

**B**

**WT (74A)**

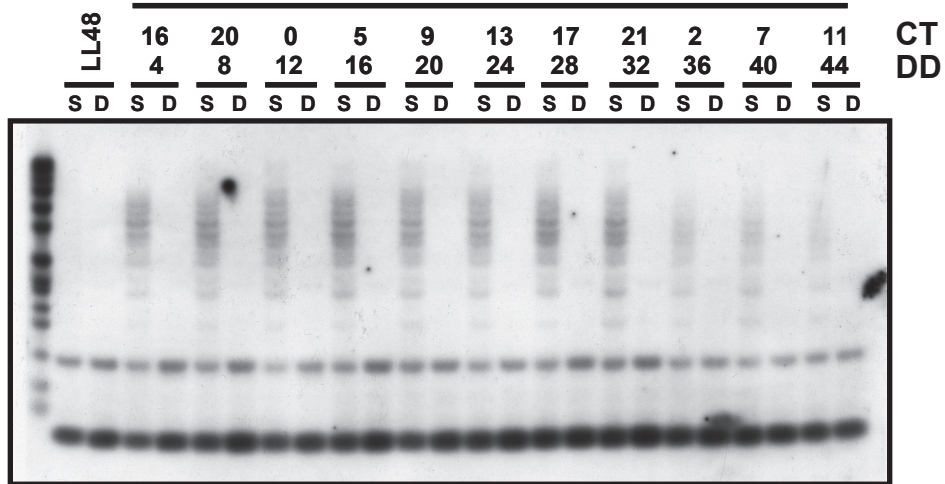

**C**

***ras-1<sup>bd</sup>***

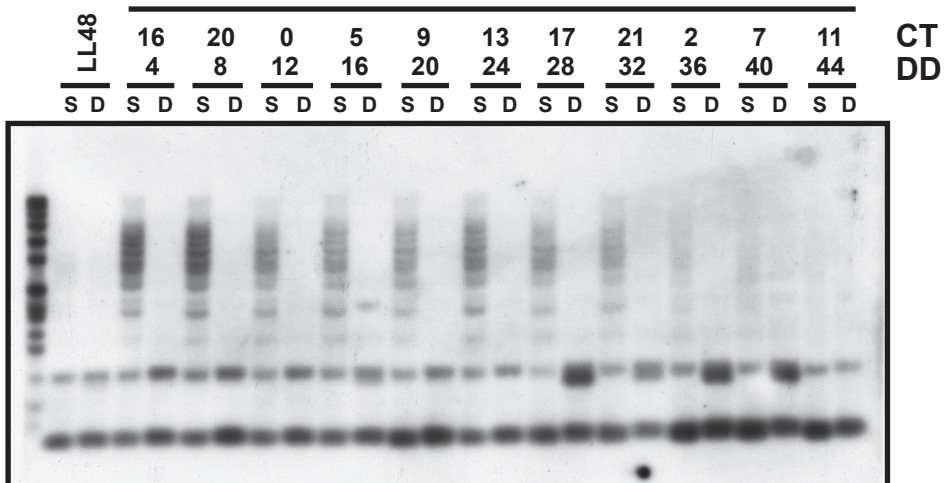

Supplement: pgen.1002166.s006.pdf [file pgen.1002166.s006.pdf]
