# Supplementary material for: CHD1 Remodels Chromatin and Influences Transient DNA Methylation at the Clock Gene frequency
Source: PubMed Central journal article supplement (PMC3140994; doi:10.1371/journal.pgen.1002166), 2011-07-21
Supplement: pgen.1002166.s008.pdf [file pgen.1002166.s008.pdf]

**Table S1****Strains Used in this Study**

| <b>Strain</b>                     | <b>Genotype</b>                                                              | <b>Reference</b>       |
|-----------------------------------|------------------------------------------------------------------------------|------------------------|
| FGSC 2489                         | 74-OR23-1V A (WT)                                                            | FGSC                   |
| 328-4                             | A, <i>ras-1<sup>bd</sup></i>                                                 | Froehlich et al., 2002 |
| 94-40                             | A, <i>ras-1<sup>bd</sup> frq<sup>9</sup></i>                                 | Loros et al., 1986     |
| <i>frq<sup>10</sup>, frqccg-2</i> | A, <i>ras-1<sup>bd</sup>, frq<sup>10</sup>, his-3<sup>+</sup>::pfrqccg-2</i> | Kramer et al., 2003    |
| FGSC8594                          | <i>a, his-3, dim-2::hph</i>                                                  | FGSC                   |
| FGSC14805                         | <i>a, NCU03060::hph, mus52::Bar</i>                                          | Colot et al., 2006     |
| FGSC9014                          | A, <i>rid<sup>-</sup>, his-3<sup>-</sup></i>                                 | FGSC                   |
| FGSC9015                          | <i>a, rid<sup>-</sup>, his-3<sup>-</sup></i>                                 | FGSC                   |
| FGSC9014 (pVG110)                 | A, <i>rid<sup>-</sup>, his-3<sup>+</sup>::pVG110</i>                         | Lorrondo et al.        |
| FGSC9015 (pVG110)                 | <i>a, rid<sup>-</sup>, his-3<sup>+</sup>::pVG110</i>                         | Lorrondo et al.        |
| XG-1                              | <i>a, mus52::hph, ras-1<sup>bd</sup></i>                                     | Lorrondo et al.        |
| <i>XB99-1 (Δchd1)</i>             | <i>a, NCU03060::hph</i>                                                      | This Study             |
| XB98-3                            | <i>a, dim-2::hph, ras-1<sup>bd</sup></i>                                     | This Study             |
| XB100-9                           | A, <i>rid<sup>-</sup>, NCU03060::hph</i>                                     | This Study             |
| XB105-13                          | A, <i>rid<sup>-</sup>, NCU03060::hph, his-3<sup>+</sup>::pVG110</i>          | This Study             |
