# Supplementary material for: CHD1 Remodels Chromatin and Influences Transient DNA Methylation at the Clock Gene frequency
Source: PubMed Central journal article supplement (PMC3140994; doi:10.1371/journal.pgen.1002166), 2011-07-21
Supplement: pgen.1002166.s009.pdf [file pgen.1002166.s009.pdf]

**Table S2****Oligonucleotides**

|           |                      |
|-----------|----------------------|
| frqP4F    | TGGACCCCAGGAAAGCCCAG |
| frqP4R    | GAAGAAGCACGCTAGAACGG |
| frqP18F   | CATCGCCGAACGCTTGGCAG |
| frqP18R   | GACGTCCTCCATCGAACTAC |
| CBMeP1F   | CACTTGCTGCCCTTCATCAG |
| CBMeP2R   | CCTACATATTGCATTTGGCG |
| PLREMeP1F | CCTCAGCATTTTGTCGTGAG |
| PLREMeP1R | GGATCGAAGTGTGTTTGCGG |
| MitoP2F   | ggaaatacattacctacac  |
| MitoP2R   | ctagtcctttatcttctgg  |
